# Supplementary material
Source: Elsevier journal article supplement (https://www.sciencedirect.com/science/article/pii/S1853002820300239)
Supplement: mmc1 [file S1853002820300239:mmc1.pdf]

## ANEXO

### MODELO ENTREVISTA SEMIESTRUCTURADA ANEXADA AL CUESTIONARIO

Edad: ..... Sexo: ..... Año de Egreso: ..... Especialidad: .....

Años de Estudios de Posgrado: ..... Años de experiencia atendiendo a adultos mayores: .....

Actividad Actual: .....

### INTRODUCCION

***El abordaje de los trastornos cognitivos en adultos mayores requiere una estrategia multidimensional que pueda afrontar las diversas necesidades que plantea el enfermo y su familia, la cual agrupa estrategias farmacológicas y no farmacológicas. Estas últimas intervenciones psicosociales dirigidas a optimizar la función del enfermo y apoyar a la familia en su cuidado (intervención cognitiva, conductual, ambiental y familiar)***

1. ¿De acuerdo a lo que indica la bibliografía y su experiencia profesional ¿Qué opinión le merecen las estrategias no farmacológicas en el abordaje de trastornos cognitivos?
2. ¿Hay alguna en particular que se ha referido con mayor frecuencia? ¿Cuál?
3. ¿Considera importante su uso para estimular y prevenir los trastornos cognitivos? ¿Por qué?
4. ¿Cuáles recomendaría a sus pacientes o que actividades les sugeriría?
5. En aquellos pacientes con un deterioro demencial ¿también le parecen necesarias?, ¿por qué?
6. ¿Suele dar indicaciones a los familiares de paciente? ¿Cuáles?
7. ¿Ha trabajado con otros profesionales que se realizan un abordaje no farmacológico de trastornos cognitivos?
8. ¿Valora como positiva, indiferente o negativa su experiencia con la indicación de ENFs

## CUESTIONARIO A MEDICOS

*El abordaje de los trastornos cognitivos en adultos mayores requiere una estrategia multidimensional que pueda afrontar las diversas necesidades que plantea el enfermo y su familia, la cual agrupa estrategias farmacológicas y no farmacológicas. Estas últimas intervenciones psicosociales dirigidas a optimizar la función del enfermo y apoyar a la familia en su cuidado (intervención cognitiva, conductual, ambiental y familiar). En el siguiente cuestionario deseamos conocer su opinión sobre las ESTRATEGIAS NO FARMACOLÓGICAS (ENFs) en deterioro cognitivo (DC).*

*Sus respuestas son anónimas y confidenciales. Gracias por su colaboración.*

Edad: ..... Sexo:..... Año de Egreso:.....Especialidad:.....

Años de Estudios de Posgrado: ..... Años de experiencia atendiendo a adultos mayores:.....

| 1-DEL SIGUIENTE GRUPO DE ESTRATEGIAS NO FARMACOLÓGICAS INDIQUE (Marcando con una o varias X) TODAS LAS QUE CONOCE |  |
|-------------------------------------------------------------------------------------------------------------------|--|
| Terapias de enfoque emocional                                                                                     |  |
| Terapias de aproximación conductual                                                                               |  |
| Terapias de enfoque cognitivo                                                                                     |  |
| Terapias de estimulación                                                                                          |  |
| Terapias dirigidas a los cuidadores                                                                               |  |

| 2-DEL SIGUIENTE GRUPO DE ENFs INDIQUE (Marcando con una o varias X) TODAS LAS QUE CONOCE |  |                                       |  |                                                                        |  |
|------------------------------------------------------------------------------------------|--|---------------------------------------|--|------------------------------------------------------------------------|--|
| Terapia de reminiscencia                                                                 |  | T. de Orientación a la realidad (TOR) |  | T. para fomentar la independencia y minimizar alteraciones de conducta |  |
| Terapia de validación.                                                                   |  | Psicoestimulación cognitiva           |  | Actividades recreativas,                                               |  |
| Integración sensorial                                                                    |  | Rehabilitación cognitiva,             |  | arteterapia,                                                           |  |
| Presencia estimulada                                                                     |  | Talleres de Memoria                   |  | musicoterapia                                                          |  |
| Psicoeducación                                                                           |  | Grupos de soporte, psicoeducación     |  | Psicoterapia de apoyo,                                                 |  |

| 3- ¿CONOCE ALGUNA OTRA? |  |          |
|-------------------------|--|----------|
| SI                      |  | ¿CUALES? |
| NO                      |  |          |

| 4- ¿CONSIDERA QUE SON ÚTILES LAS ENFs PARA LA PREVENCIÓN DE TRASTORNOS COGNITIVOS EN ADULTOS MAYORES? |      |             |          |       |
|-------------------------------------------------------------------------------------------------------|------|-------------|----------|-------|
| NADA                                                                                                  | POCO | MAS O MENOS | BASTANTE | MUCHO |
|                                                                                                       |      |             |          |       |

| 5- MARQUE CON UNA O VARIAS X...EL POR QUE DE LA RESPUESTA ANTERIOR |  |
|--------------------------------------------------------------------|--|
| He leído bibliografía al respecto                                  |  |
| Tuve la oportunidad de verificarlo en la practica                  |  |
| Hay colegas que lo refieren                                        |  |
| Los estudios de resultados no son convincentes                     |  |
| Los colegas no lo refieren                                         |  |
| No pude verificar resultados                                       |  |

| 6- ¿CUÁL SERÍA SEGÚN SU OPINIÓN EL RESULTADO ESPERABLE DE LA IMPLEMENTACIÓN DE ESTRATEGIAS DE PREVENCIÓN? |  |
|-----------------------------------------------------------------------------------------------------------|--|
| Retrasar el deterioro cognitivo                                                                           |  |
| Mantener al paciente con expectativas de cambio                                                           |  |
| Mejorar el funcionamiento cognitivo                                                                       |  |
| Que los pacientes tengan técnicas para trabajar con los olvidos                                           |  |
| Que los pacientes disminuyan sus miedos de tener demencia                                                 |  |

| 7- ¿LE SOLICITAN SUS PACIENTES REALIZAR ESTRATEGIAS NO FARMACOLOGICAS (ENFs) COMO ESTRATEGIA DE PREVENCIÓN? |      |             |          |       |
|-------------------------------------------------------------------------------------------------------------|------|-------------|----------|-------|
| NADA                                                                                                        | POCO | MAS O MENOS | BASTANTE | MUCHO |
|                                                                                                             |      |             |          |       |

| 8- EN QUÉ GRADO RECOMIENDA LA REALIZACIÓN DE ESTRATEGIAS NO FARMACOLOGICAS (ENFs) COMO ESTRATEGIA DE PREVENCIÓN |      |             |          |       |
|-----------------------------------------------------------------------------------------------------------------|------|-------------|----------|-------|
| NADA                                                                                                            | POCO | MAS O MENOS | BASTANTE | MUCHO |
|                                                                                                                 |      |             |          |       |

| 9- ¿CONSIDERA QUE SON ÚTILES LAS ENFs PARA REHABILITACIÓN CUANDO YA EXISTE EL DIAGNOSTICO DE DETERIORO COGNITIVO EN ADULTOS MAYORES? |      |             |          |       |
|--------------------------------------------------------------------------------------------------------------------------------------|------|-------------|----------|-------|
| NADA                                                                                                                                 | POCO | MAS O MENOS | BASTANTE | MUCHO |
|                                                                                                                                      |      |             |          |       |

| 10- MARQUE CON UNA O VARIAS X...EL POR QUE DE LA RESPUESTA ANTERIOR |  |
|---------------------------------------------------------------------|--|
| He leído bibliografía al respecto                                   |  |
| Tuve la oportunidad de verificarlo en la practica                   |  |
| Hay colegas que lo refieren                                         |  |
| Los estudios de resultados no son convincentes                      |  |
| Los colegas no lo refieren                                          |  |
| No pude verificar resultados                                        |  |

| 11- ¿CUÁL SERÍA SEGÚN SU OPINIÓN EL RESULTADO ESPERABLE DE LA IMPLEMENTACIÓN ENFs EN REHABILITACIÓN? (marque con una o más x) |  |
|-------------------------------------------------------------------------------------------------------------------------------|--|
| Retrasar el deterioro cognitivo                                                                                               |  |
| Mantener al paciente con expectativas de cambio                                                                               |  |
| Mejorar el funcionamiento cognitivo                                                                                           |  |
| Que los pacientes tengan técnicas para trabajar con los olvidos                                                               |  |
| Que los pacientes disminuyan sus miedos de tener demencia                                                                     |  |
| Calmar la ansiedad de los familiares                                                                                          |  |

| 12- ¿LE SOLICITAN SUS PACIENTES Y/O FAMILIARES REALIZAR ENFs EN REHABILITACIÓN CUANDO YA EXISTE EL DIAGNÓSTICO DE DETERIORO COGNITIVO? |      |             |          |       |
|----------------------------------------------------------------------------------------------------------------------------------------|------|-------------|----------|-------|
| NADA                                                                                                                                   | POCO | MAS O MENOS | BASTANTE | MUCHO |
|                                                                                                                                        |      |             |          |       |

| 13- EN QUÉ GRADO RECOMIENDA LA REALIZACIÓN DE ENFs PARA REHABILITACIÓN CUANDO YA HAY UN DIAGNOSTICO DE DETERIORO COGNITIVO? |      |             |          |       |
|-----------------------------------------------------------------------------------------------------------------------------|------|-------------|----------|-------|
| NADA                                                                                                                        | POCO | MAS O MENOS | BASTANTE | MUCHO |
|                                                                                                                             |      |             |          |       |

| 14- MARQUE SEGÚN SU OPINIÓN CUALES CONSIDERA QUE SERÍAN LAS DIFICULTADES EN LA IMPLEMENTACIÓN DE ENFs |  |
|-------------------------------------------------------------------------------------------------------|--|
| No son reconocidas por las obras sociales                                                             |  |
| No hay muchos profesionales que las implementan                                                       |  |
| Hay falta de confianza en los resultados                                                              |  |
| Requieren demasiado esfuerzo por parte de los pacientes                                               |  |

| 15- ¿CONOCE UD. PROFESIONALES QUE IMPLEMENTAN ENFs EN SU MEDIO? |      |             |          |       |
|-----------------------------------------------------------------|------|-------------|----------|-------|
| NADA                                                            | POCO | MAS O MENOS | BASTANTE | MUCHO |
|                                                                 |      |             |          |       |

| 16. INDIQUE SU ACUERDO O DESACUERDO CON LOS SIGUIENTES ENUNCIADOS, SEGÚN LA SIGUIENTE INDIQUE ESCALA DE REFERENCIA: |                      |                  |             |            |                   |
|---------------------------------------------------------------------------------------------------------------------|----------------------|------------------|-------------|------------|-------------------|
|                                                                                                                     | MUY EN<br>DESACUERDO | EN<br>DESACUERDO | INDIFERENTE | DE ACUERDO | MUY DE<br>ACUERDO |
| LAS ENFs SON UTILES PARA RETRASAR EL DESARROLLO DE UN DETERIORO COGNITIVO INCIPIENTE.                               |                      |                  |             |            |                   |
| EN EL MEDIO LOCAL NO HAY PROFESIONALES QUE APLIQUEN LAS ENFs                                                        |                      |                  |             |            |                   |
| EN LOS CASOS DONDE YA HAY UN DETERIORO AVANZADO NO SON UTILES LAS ENFs                                              |                      |                  |             |            |                   |
| SUGERIR A LOS PACIENTES LA REALIZACION DE CRUCIGRAMAS, LECTURAS, ETC. ES SUFICIENTE COMO ESTRATEGIA DE PREVENCION   |                      |                  |             |            |                   |
| SI LOS PACIENTES REALIZAN TALLERES DE MEMORIA DURANTE ALGUNOS MESES YA ESTARIAN PROTEGIDOS DEL DETERIORO COGNITIVO  |                      |                  |             |            |                   |
| LOS PACIENTES Y SUS FAMILIAS SOLICITAN INFORMACION SOBRE LAS ENFs                                                   |                      |                  |             |            |                   |
| LAS ENFs SE PUEDEN REALIZAR SOLO CUANDO LOS PACIENTES ESTAN INSTITUCIONALIZADOS                                     |                      |                  |             |            |                   |
| LA IMPLEMENTACION DE ENFs ES MUY COSTOSA ECONOMICAMENTE PARA LOS PACIENTES                                          |                      |                  |             |            |                   |
| LOS PROFESIONALES QUE REALIZAN ENFs NO DIFUNDEN SUS ACTIVIDADES                                                     |                      |                  |             |            |                   |
| LA REHABILITACION COGNITIVA Y MEDICACIÓN PUEDE RETRASAR EL DETERIORO EN CASOS DE DEMENCIA                           |                      |                  |             |            |                   |
| LOS TALLERES DE MEMORIA SOLO SON UTILES CUANDO LAS PERSONAS NO PRESENTAN DETERIORO                                  |                      |                  |             |            |                   |
| NO HAY SUFICIENTE EVIDENCIA EN LA LITERATURA SOBRE LA EFICACIA DE LAS ENFs                                          |                      |                  |             |            |                   |
